# Supplementary material for: Accelerated Evolution of the ASPM Gene Controlling Brain Size Begins Prior to Human Brain Expansion
Source: PubMed Central journal article supplement (PMC374243; doi:10.1371/journal.pbio.0020126), 2004-03-23
Supplement: pbio.0020126.st001.pdf [file pbio.0020126.st001.pdf]

**Table 1S Primers used in this work**

| <b>Primer</b>     | <b>Sequence</b>                                                               |
|-------------------|-------------------------------------------------------------------------------|
| <b>Hook</b>       |                                                                               |
| Ex1F/Ex1R         | 5'-agctatgcgtcgacTTCGCCATGGCAGATTCGAG-3'/5'-atgctctagaTCACTCCCACGACCTCTACA-3' |
| 3F/3R             | 5'-atcgggcccTGGGCAGACTTTGAGACTCT-3'/5'-agctatgcgtcgacAGTTATACACCACAGACCTGA-3' |
| <b>Diagnostic</b> |                                                                               |
| DGex2-1F/DGex2-1R | 5'-GGCCAAAGAGGAGAGAATAG-3'/5'-CTGACTCTGATTCTAGATCC-3'                         |
| DGex2-2F/DGex2-2R | 5'-CCTAAGAGACGTCCAATAC-3'/5'-TGTCGAAGAGGGTGTTACCT-3'                          |
| DGex27-F/DGex27-R | 5'-GGAGCTTTTGCAGATATACCG-3'/5'-GTCATAGACTTAAGACCACAG-3'                       |
| <b>Promoter</b>   |                                                                               |
| Pro-F/Pro-R1      | 5'-TTCGCCATGGCAGATTCGAG-3'/5'-ATGTCTGGTGGTCCACAGTG-3'                         |
| <b>Exon 18</b>    |                                                                               |
| Ex18-F1/Ex18-R2   | 5'-GGATATTGGAGAAGATATTC-3'/5'-CCTGAAACTTCCGTTTCTGT-3'                         |

Upper case letters indicate sequences homologous to *ASPM* and lower case letters indicate cloning sites.
